# Supplementary material
Source: ML conference proceedings conference paper supplement (https://openreview.net/forum?id=2n6fd8QlEC)

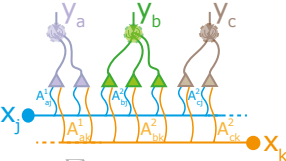

$$C_{jk} = \sum_{i,s} (A^s_{ij} - A_{ij})(A^s_{ik} - A_{ik})$$

Supplement: supplementary_material [file sister_conn_cov.pdf › repo/art/sister_conn_cov.pdf]

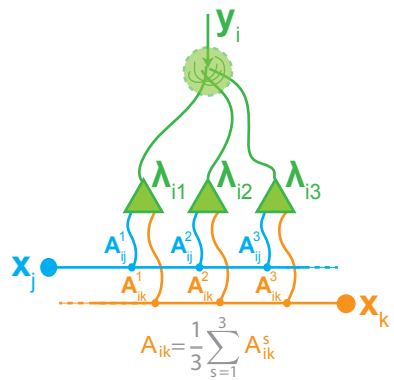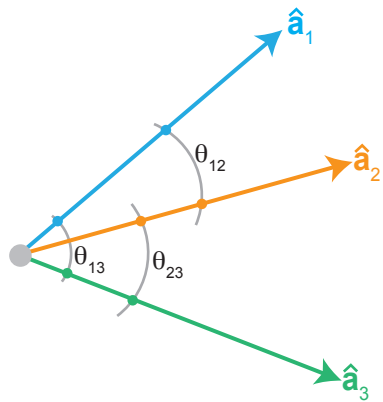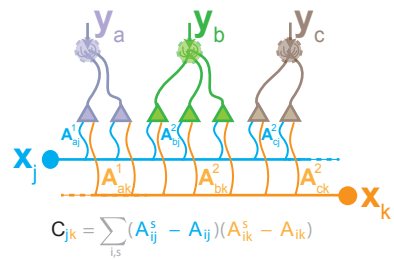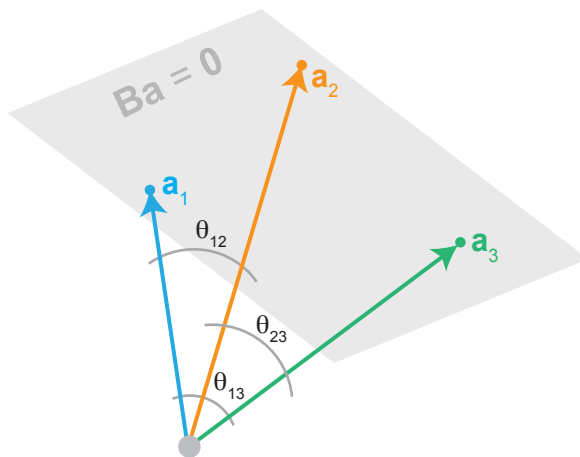

Supplement: supplementary_material [file sister_conn_schematic.pdf › repo/art/sister_conn_schematic.pdf]

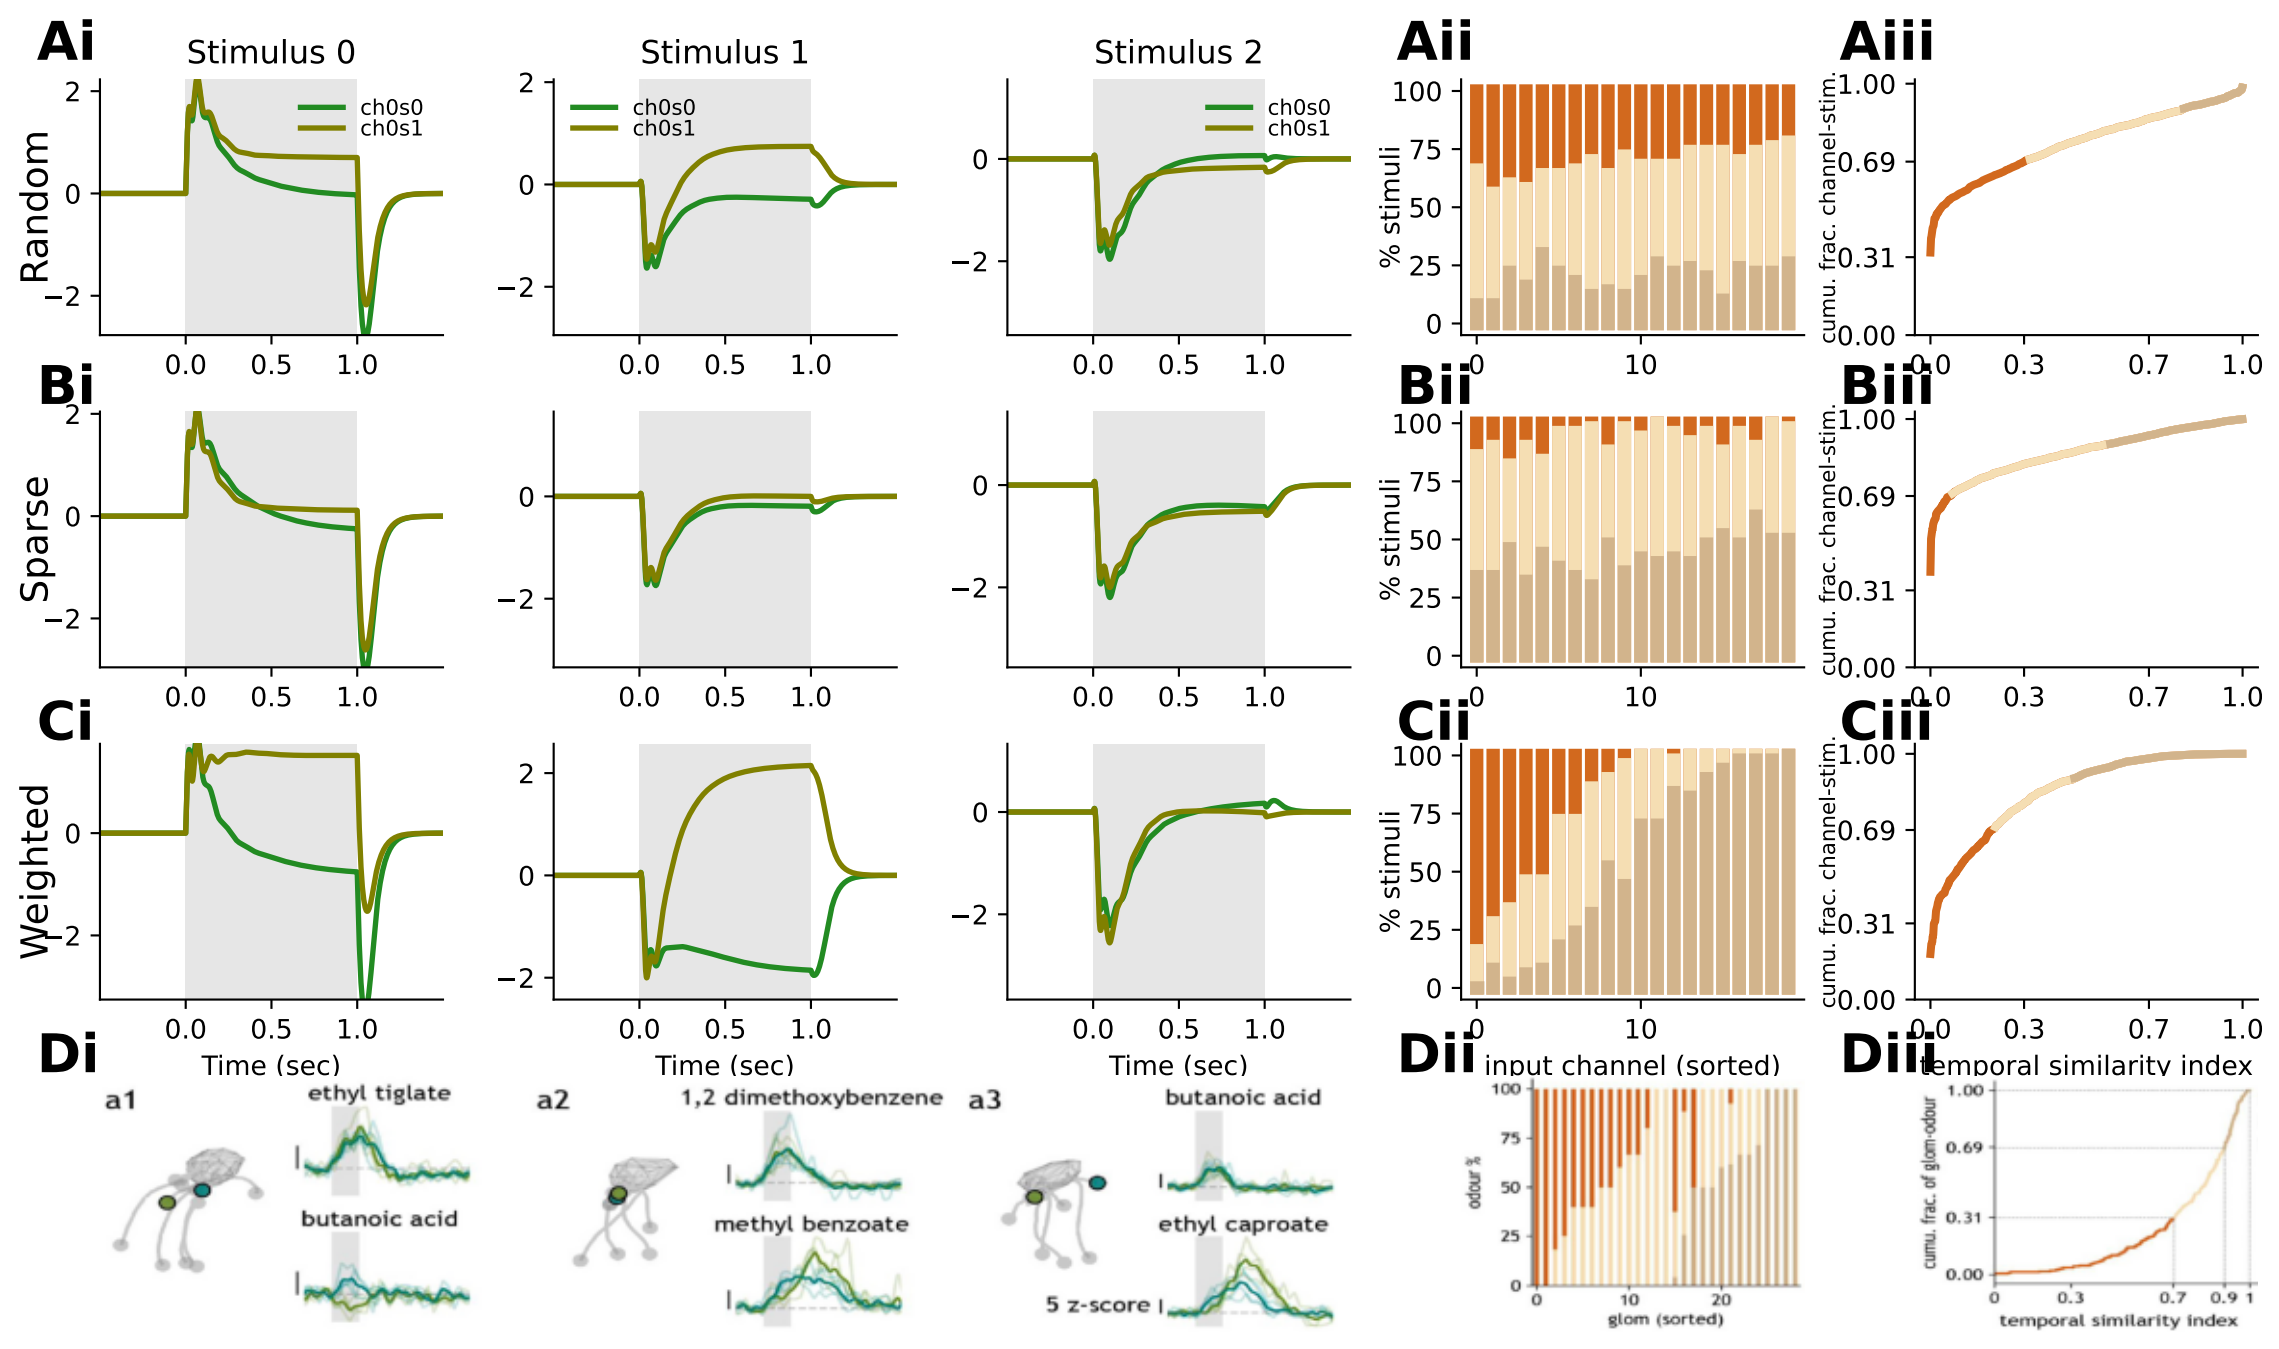

Supplement: supplementary_material [file conn_dynamics.pdf › repo/neurips/conn_dynamics.pdf]

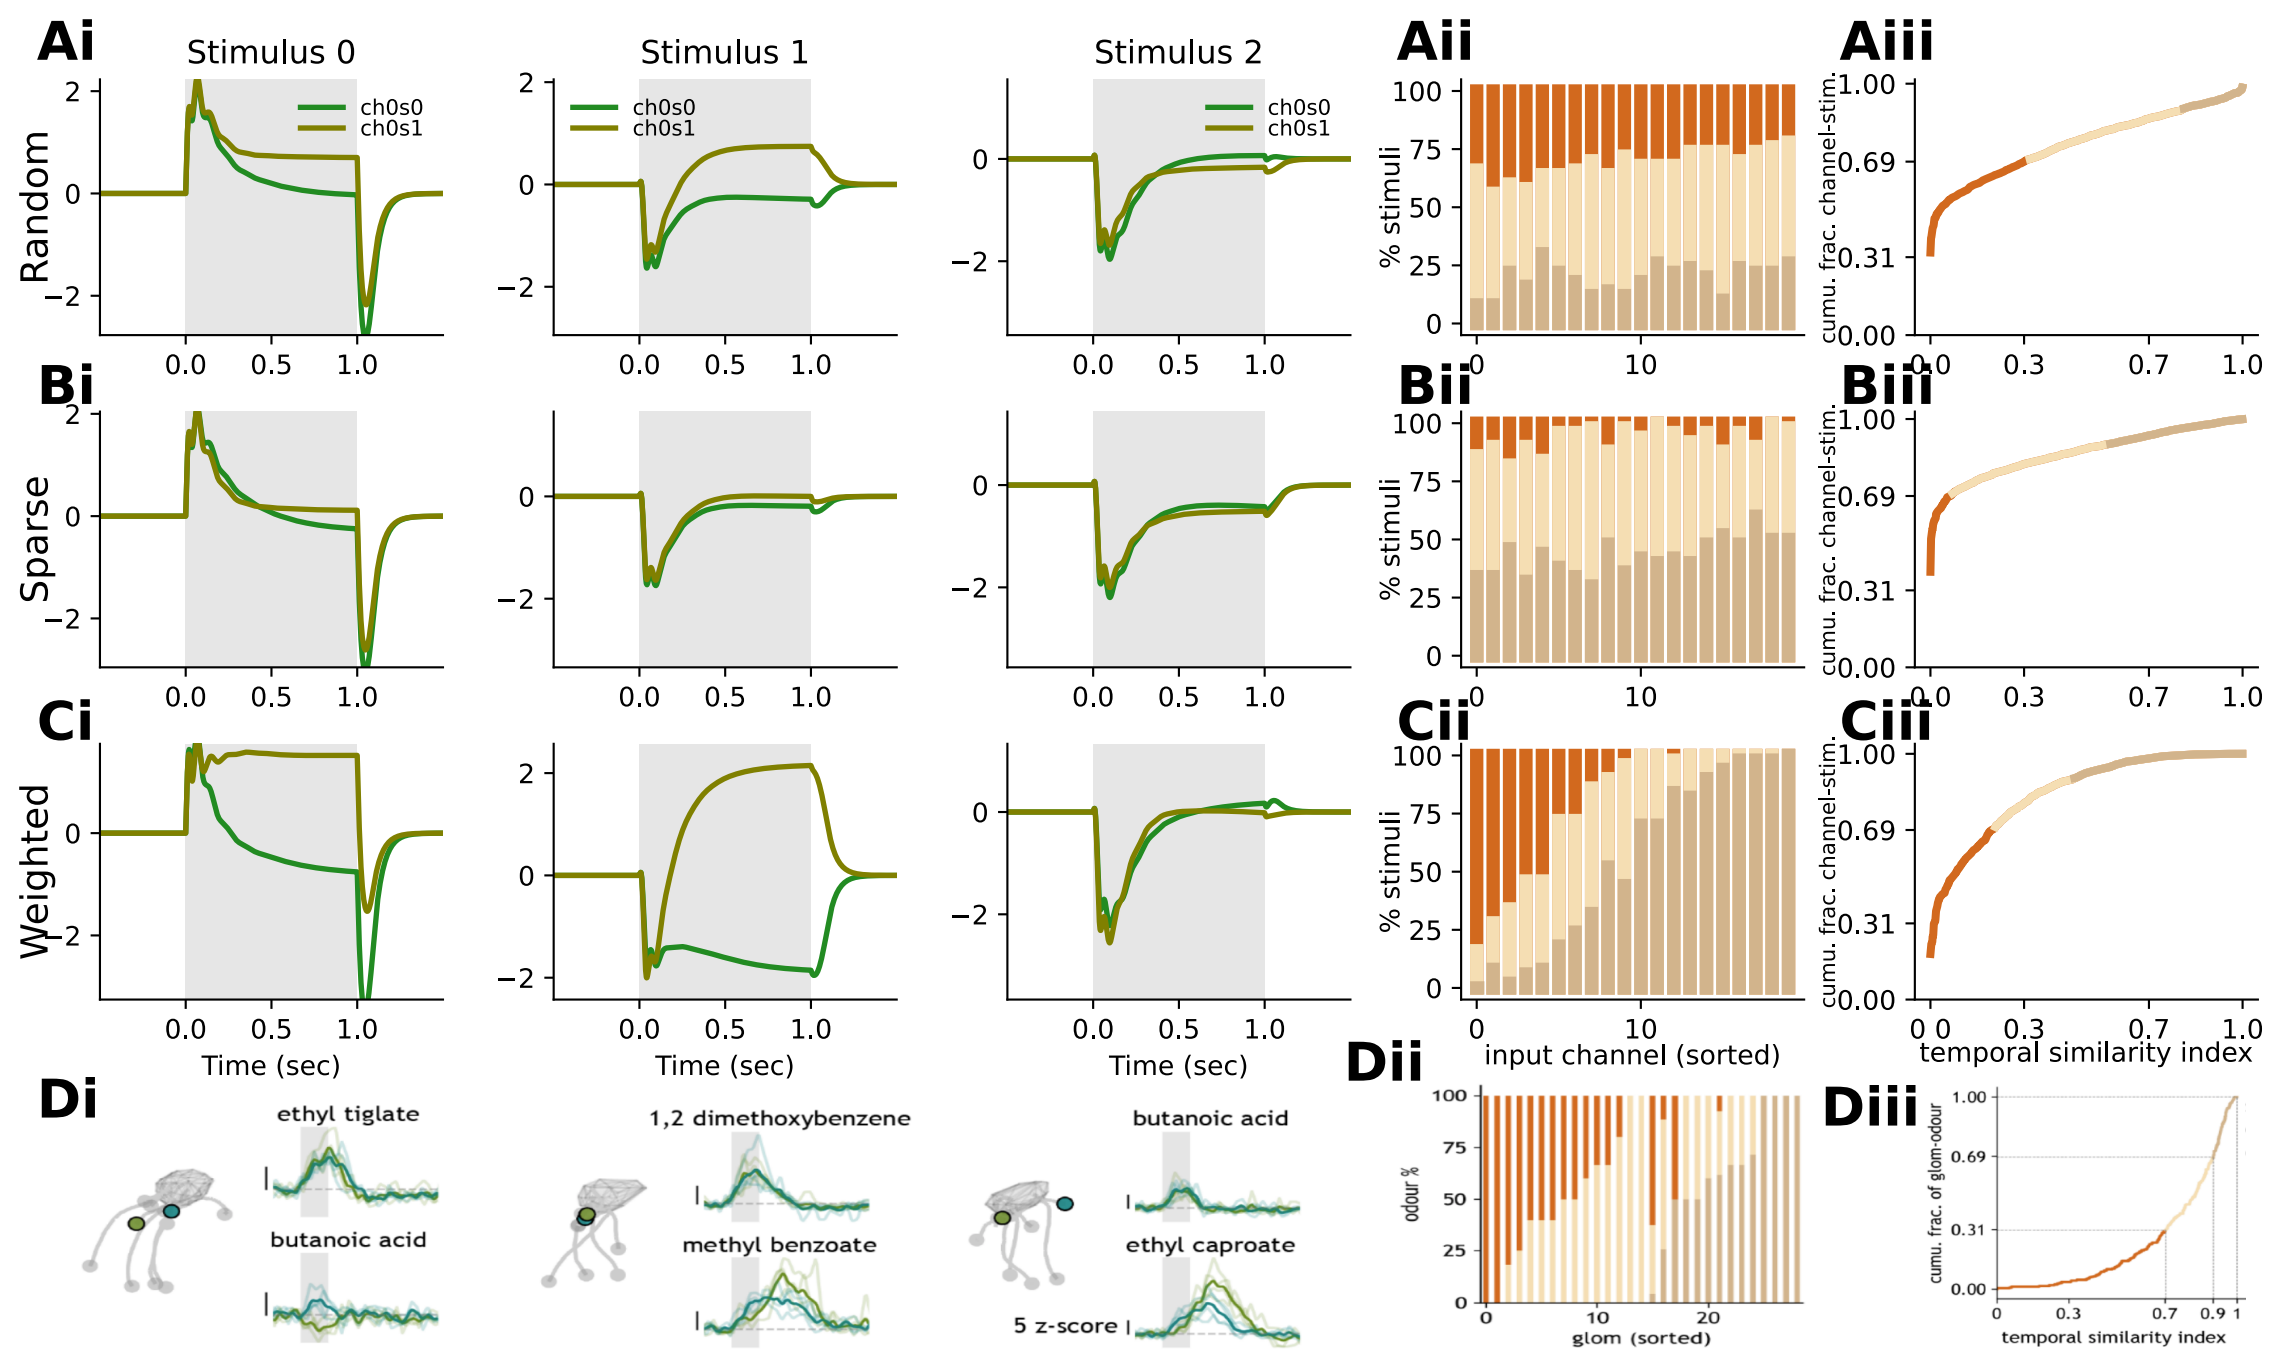

Supplement: supplementary_material [file conn_dynamics_final.pdf › repo/neurips/conn_dynamics_final.pdf]

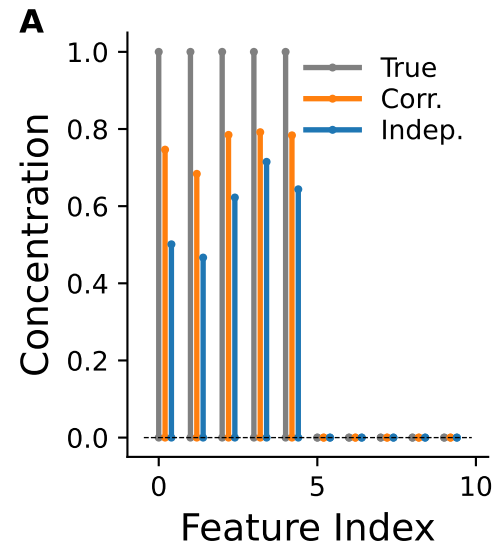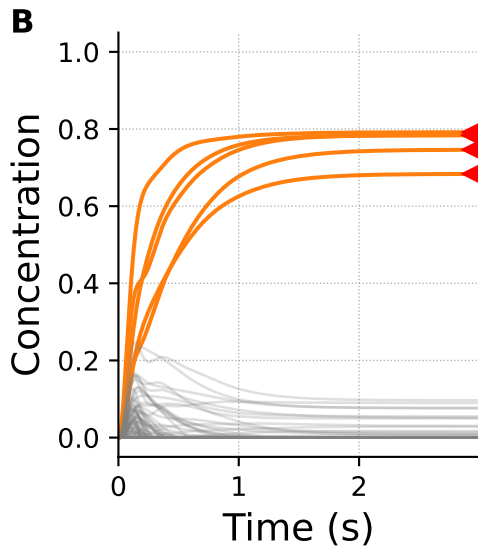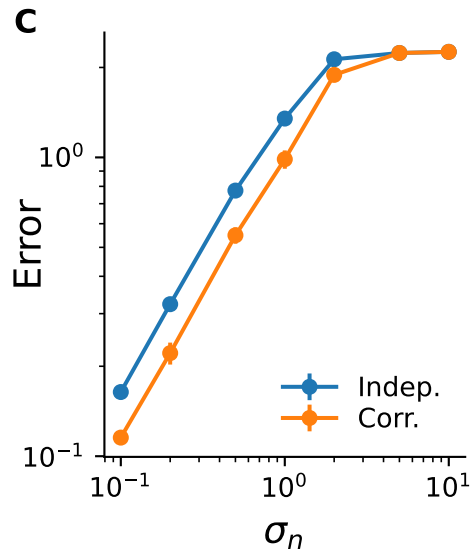

Supplement: supplementary_material [file inf_dynamics.pdf › repo/neurips/inf_dynamics.pdf]

**A**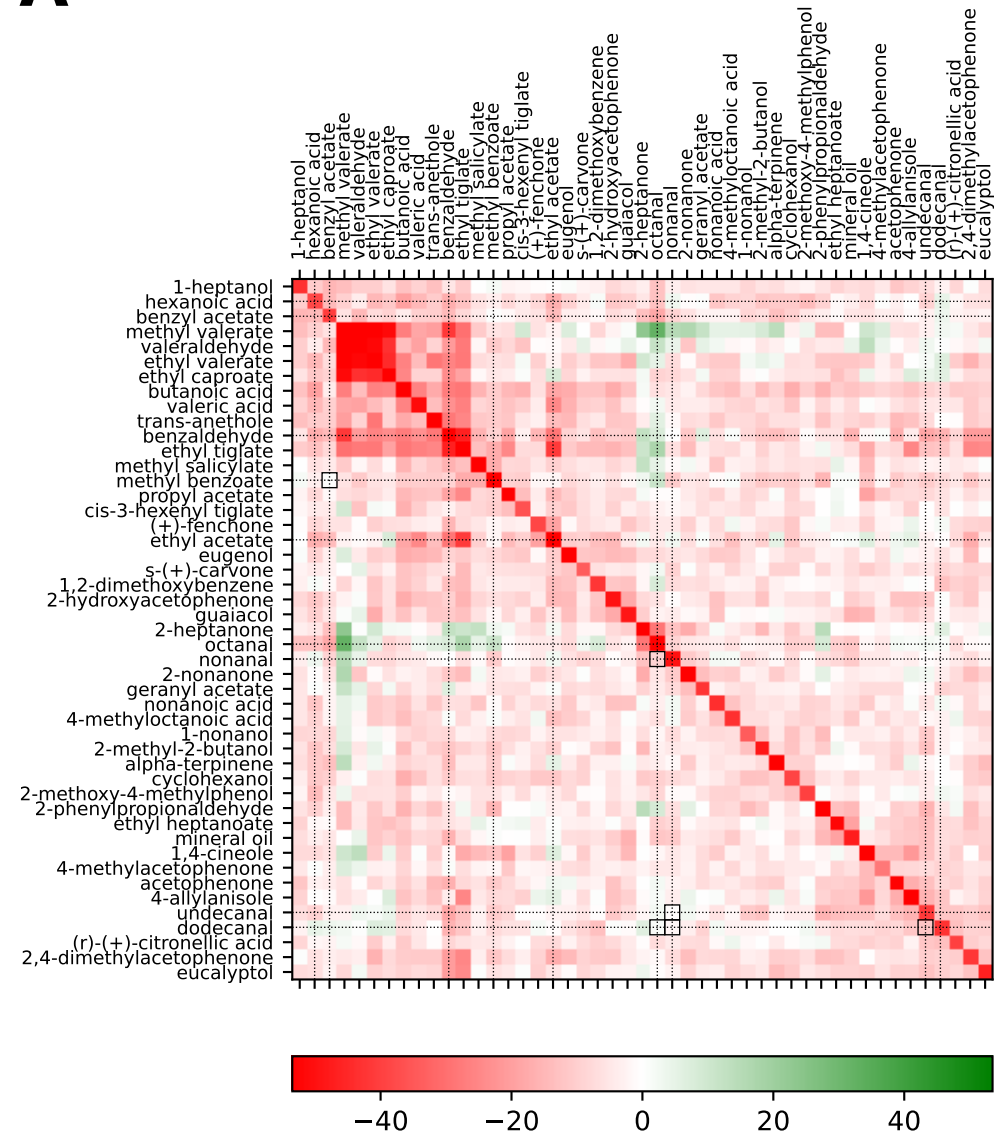**B**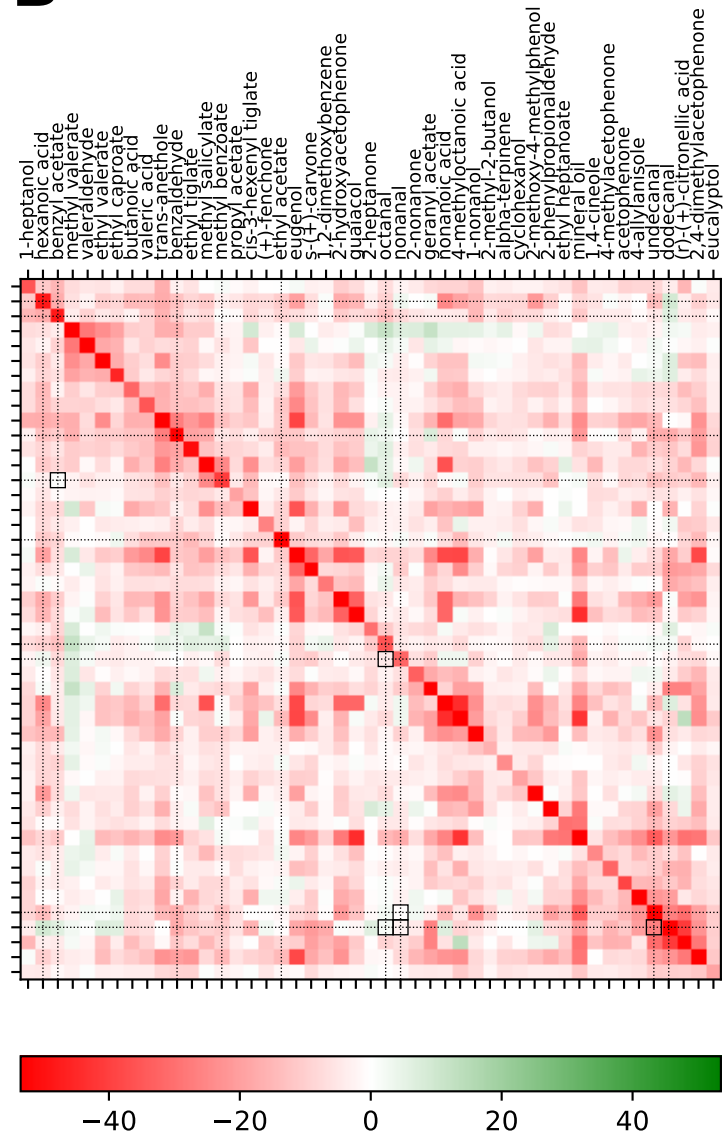**C**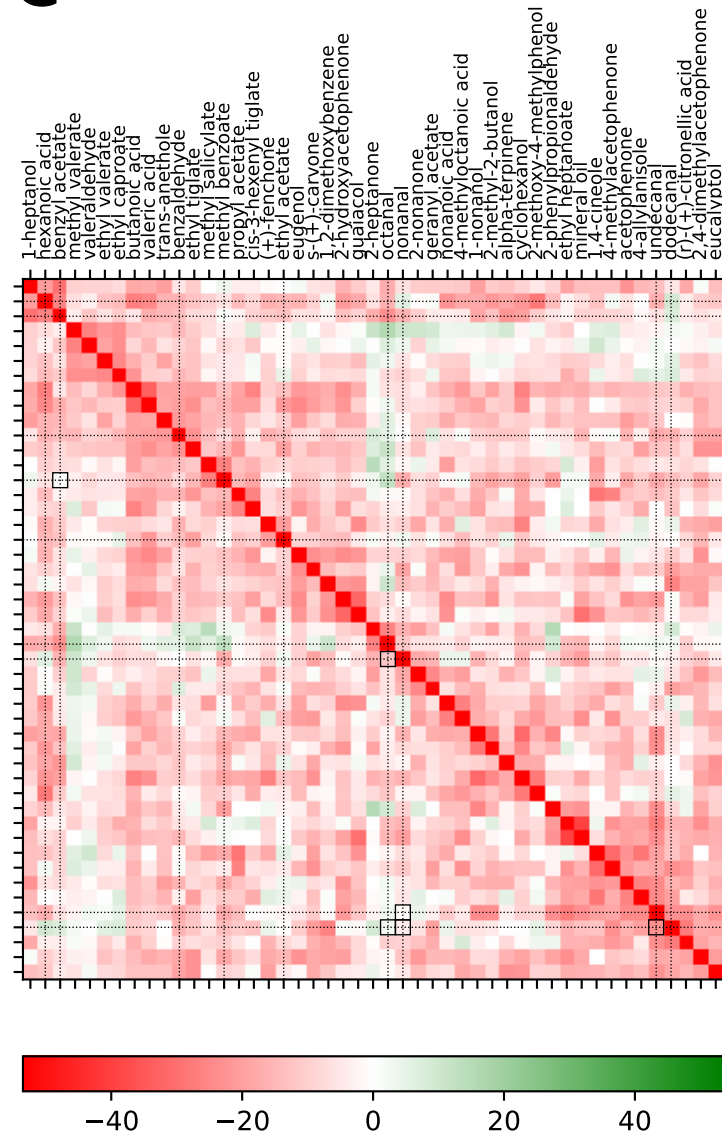

Supplement: supplementary_material [file inferred_priors.pdf › repo/neurips/inferred_priors.pdf]

**A**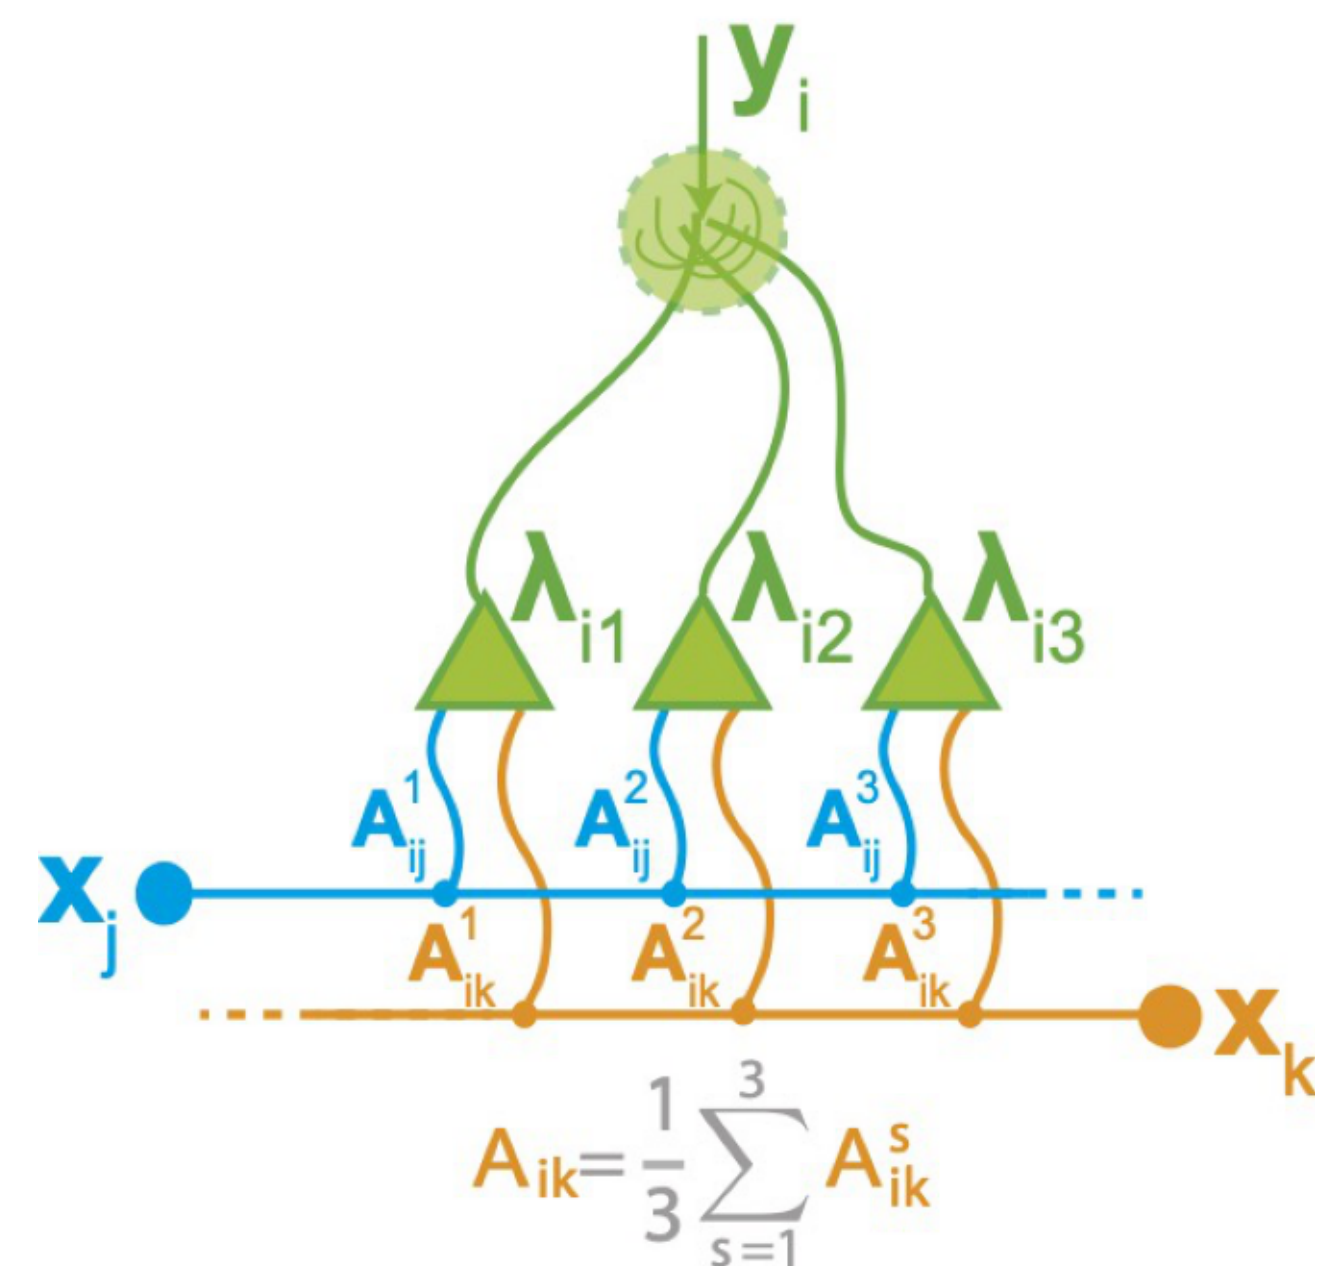**B**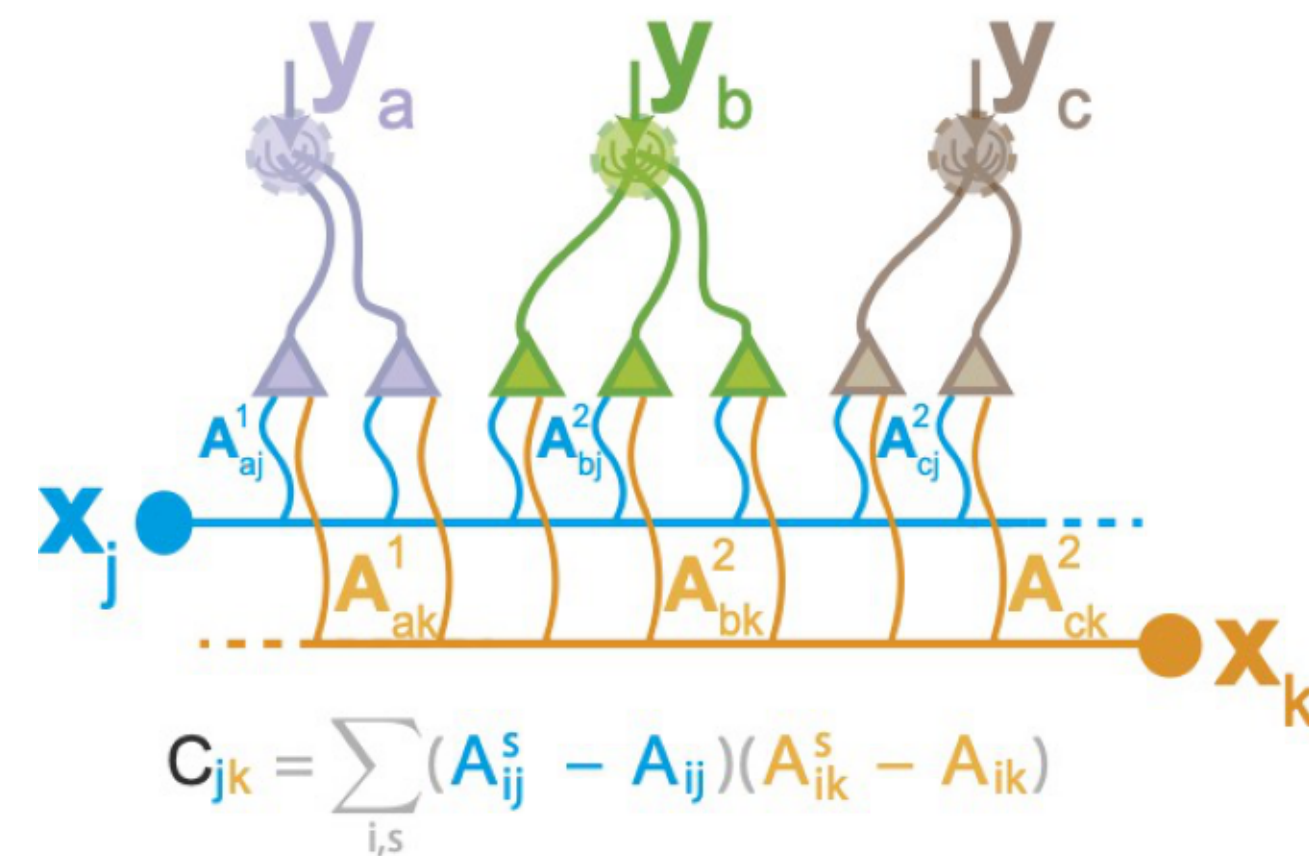**C**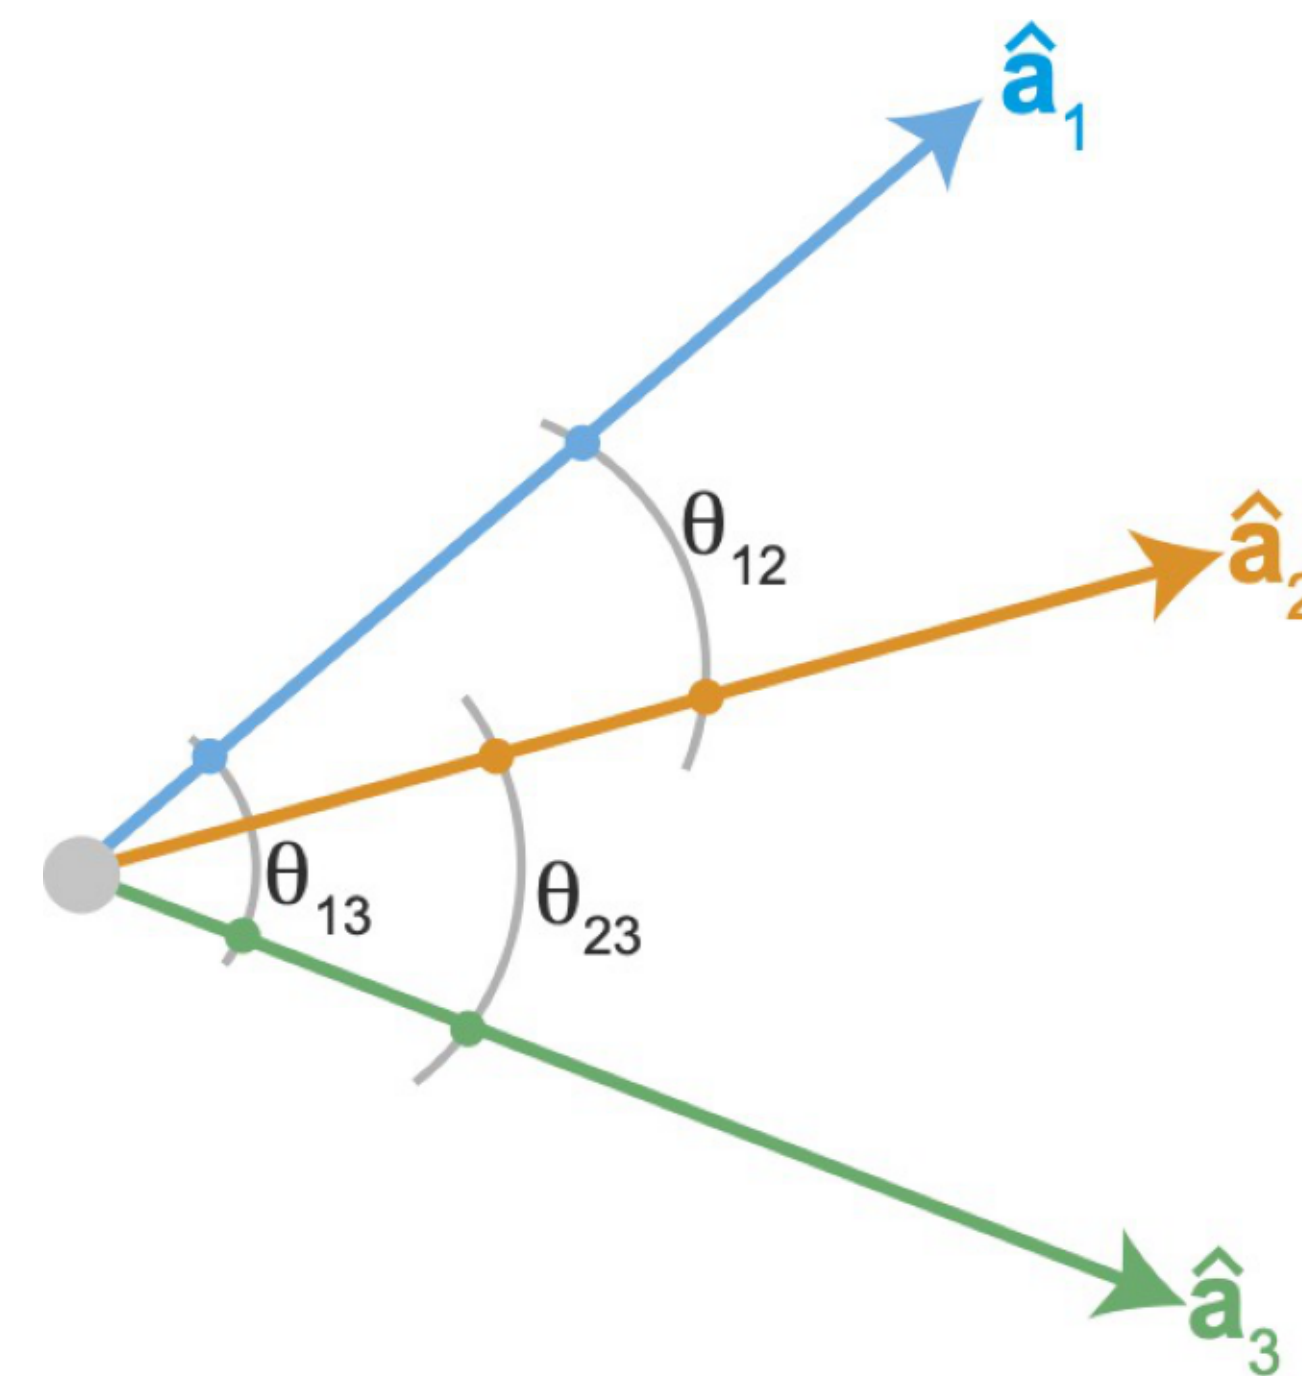**D**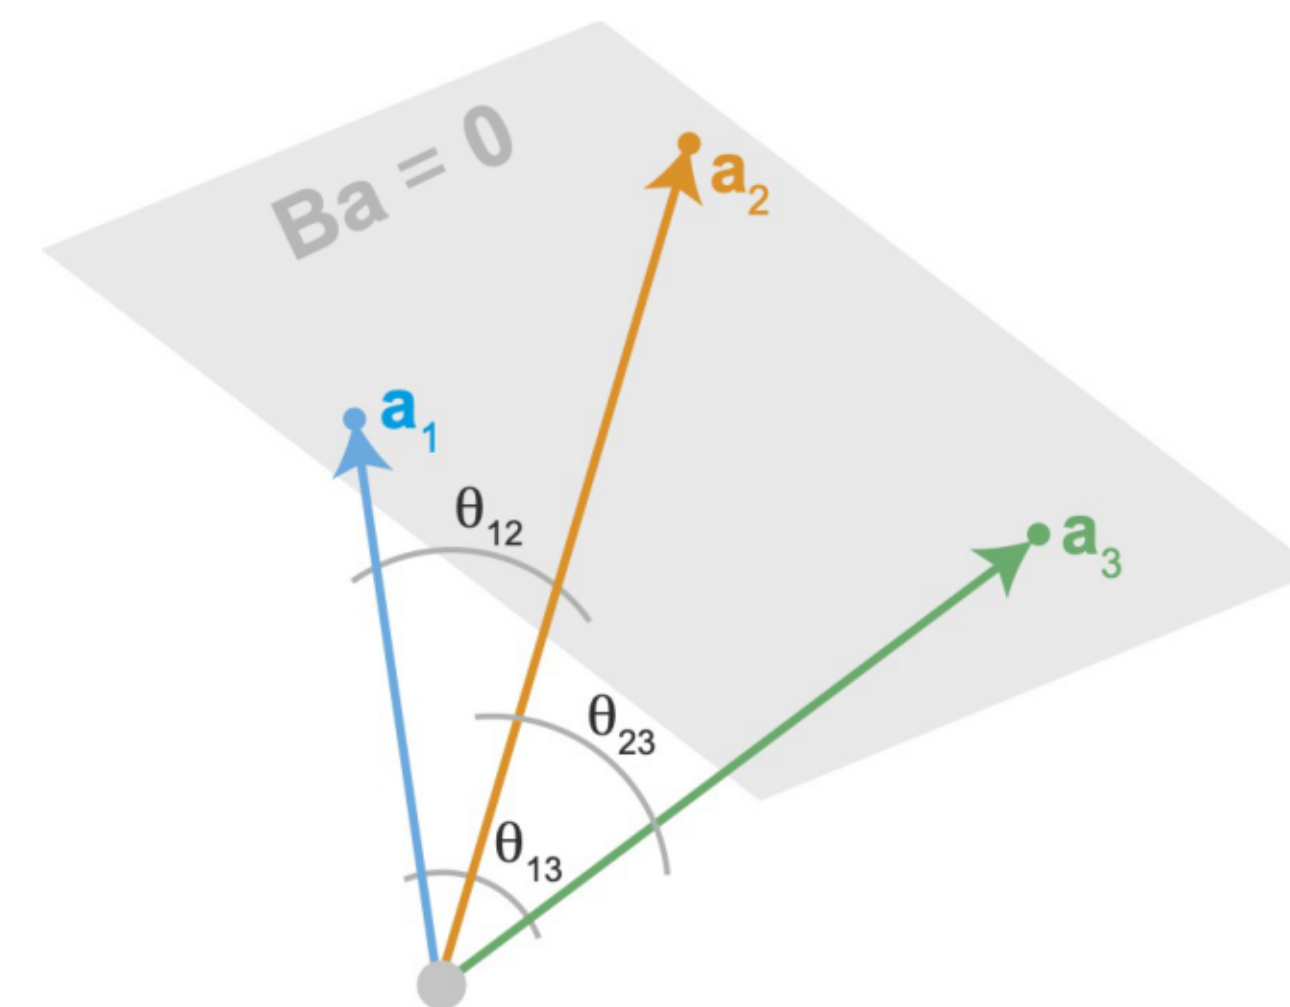**Ei**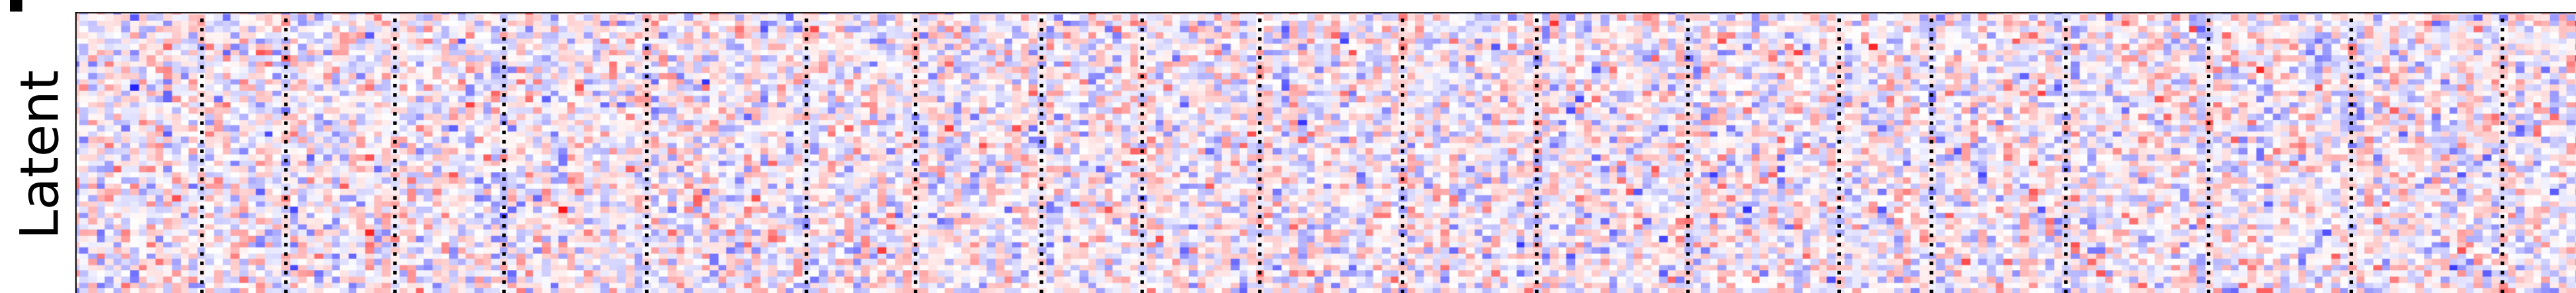**Eii**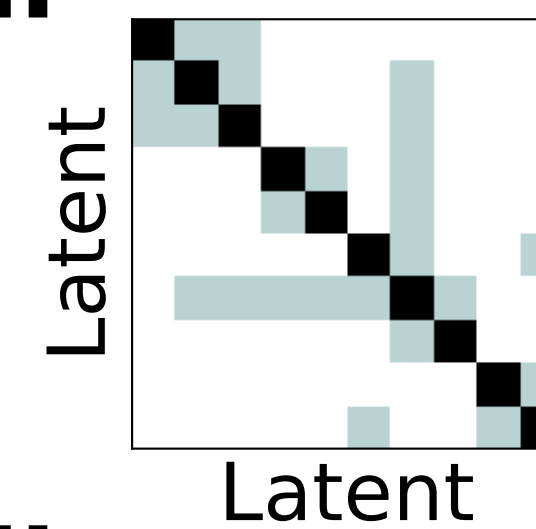**Eiii**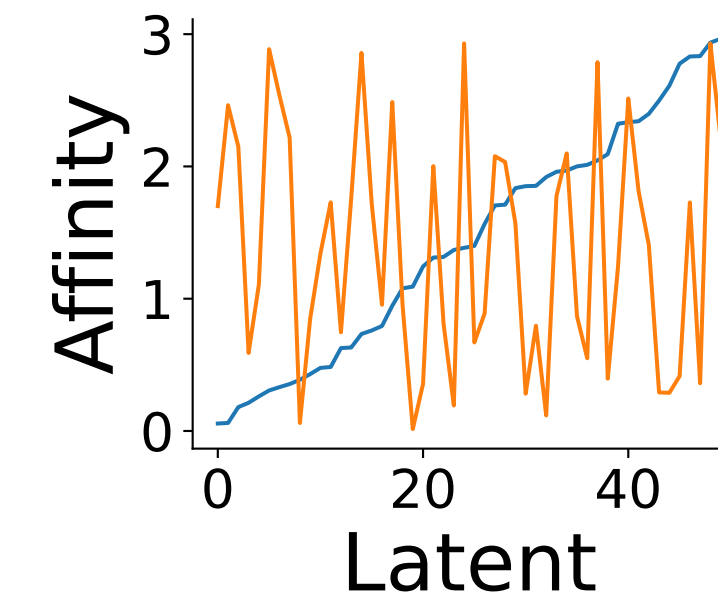**Fi**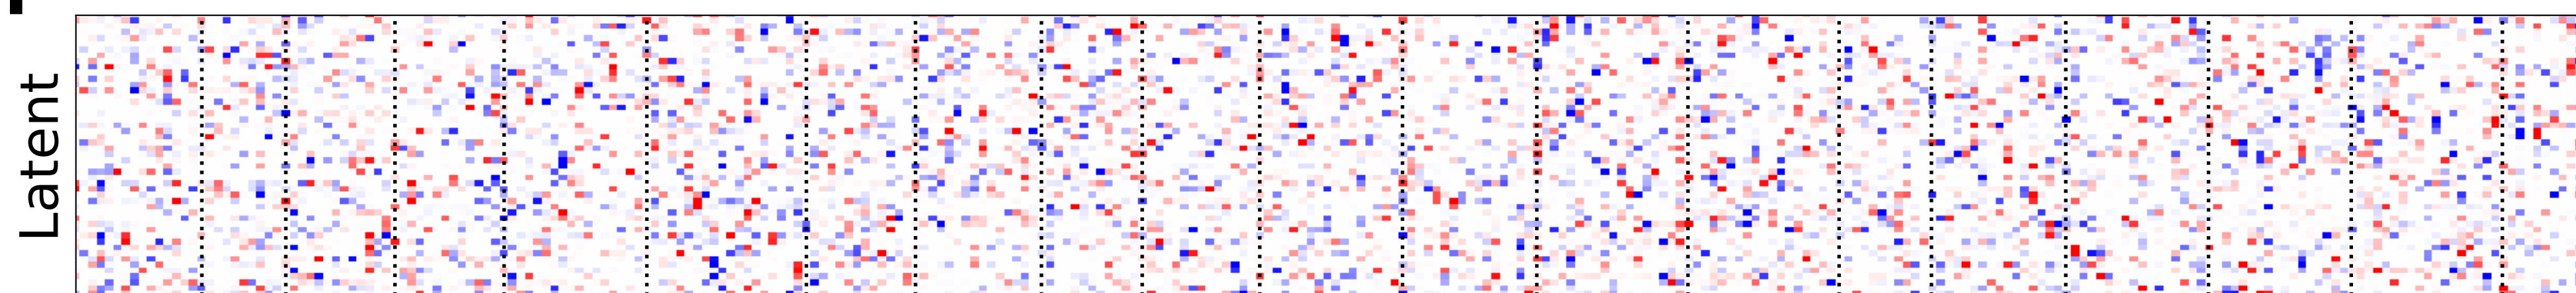**Fii**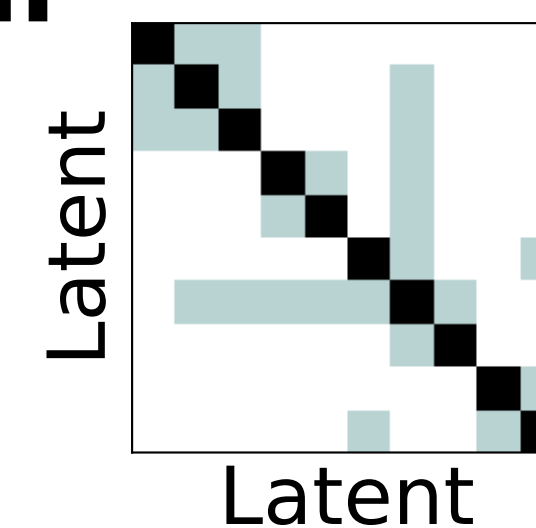**Fiii**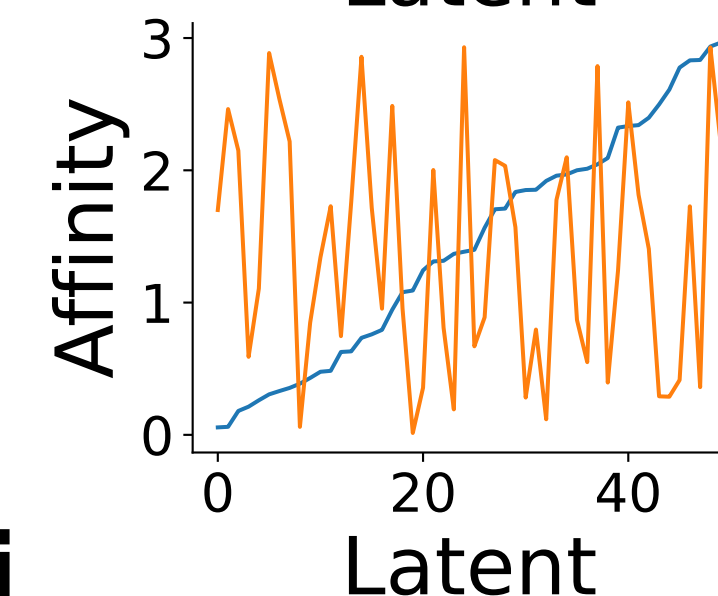**Gi**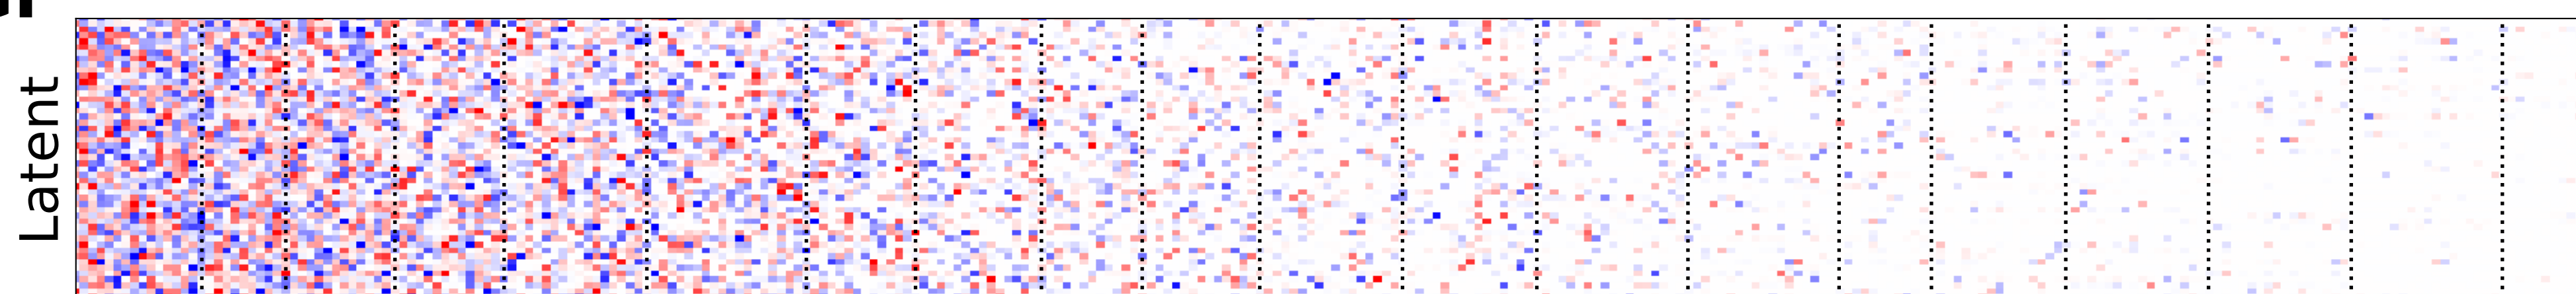**Gii**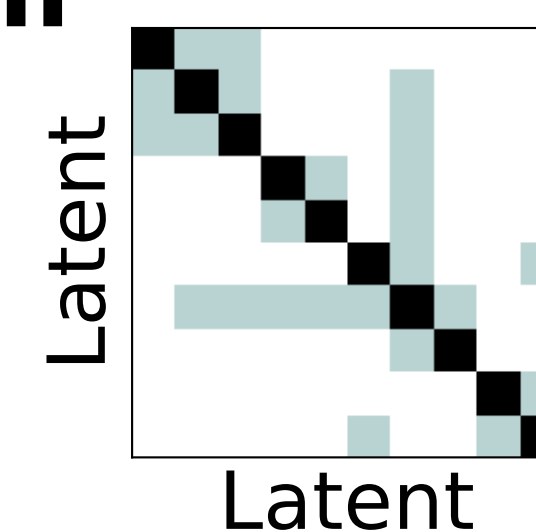**Giii**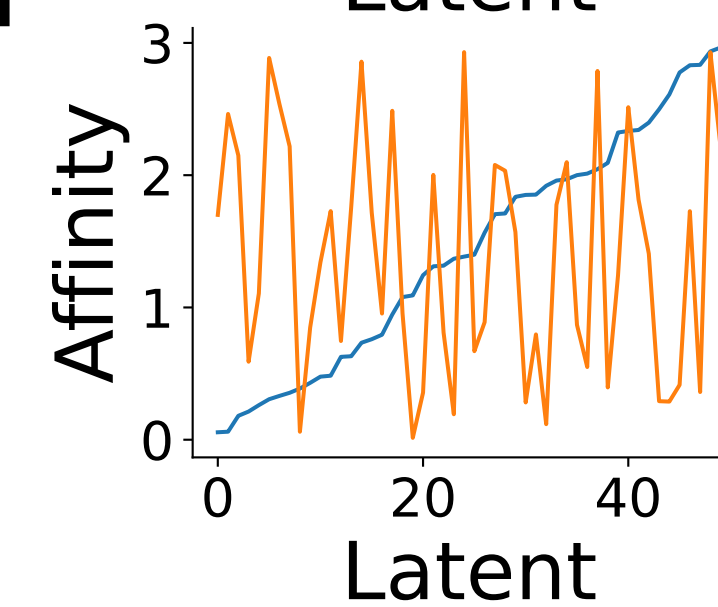

Mitral cell

Supplement: supplementary_material [file schematic.pdf › repo/neurips/schematic.pdf]

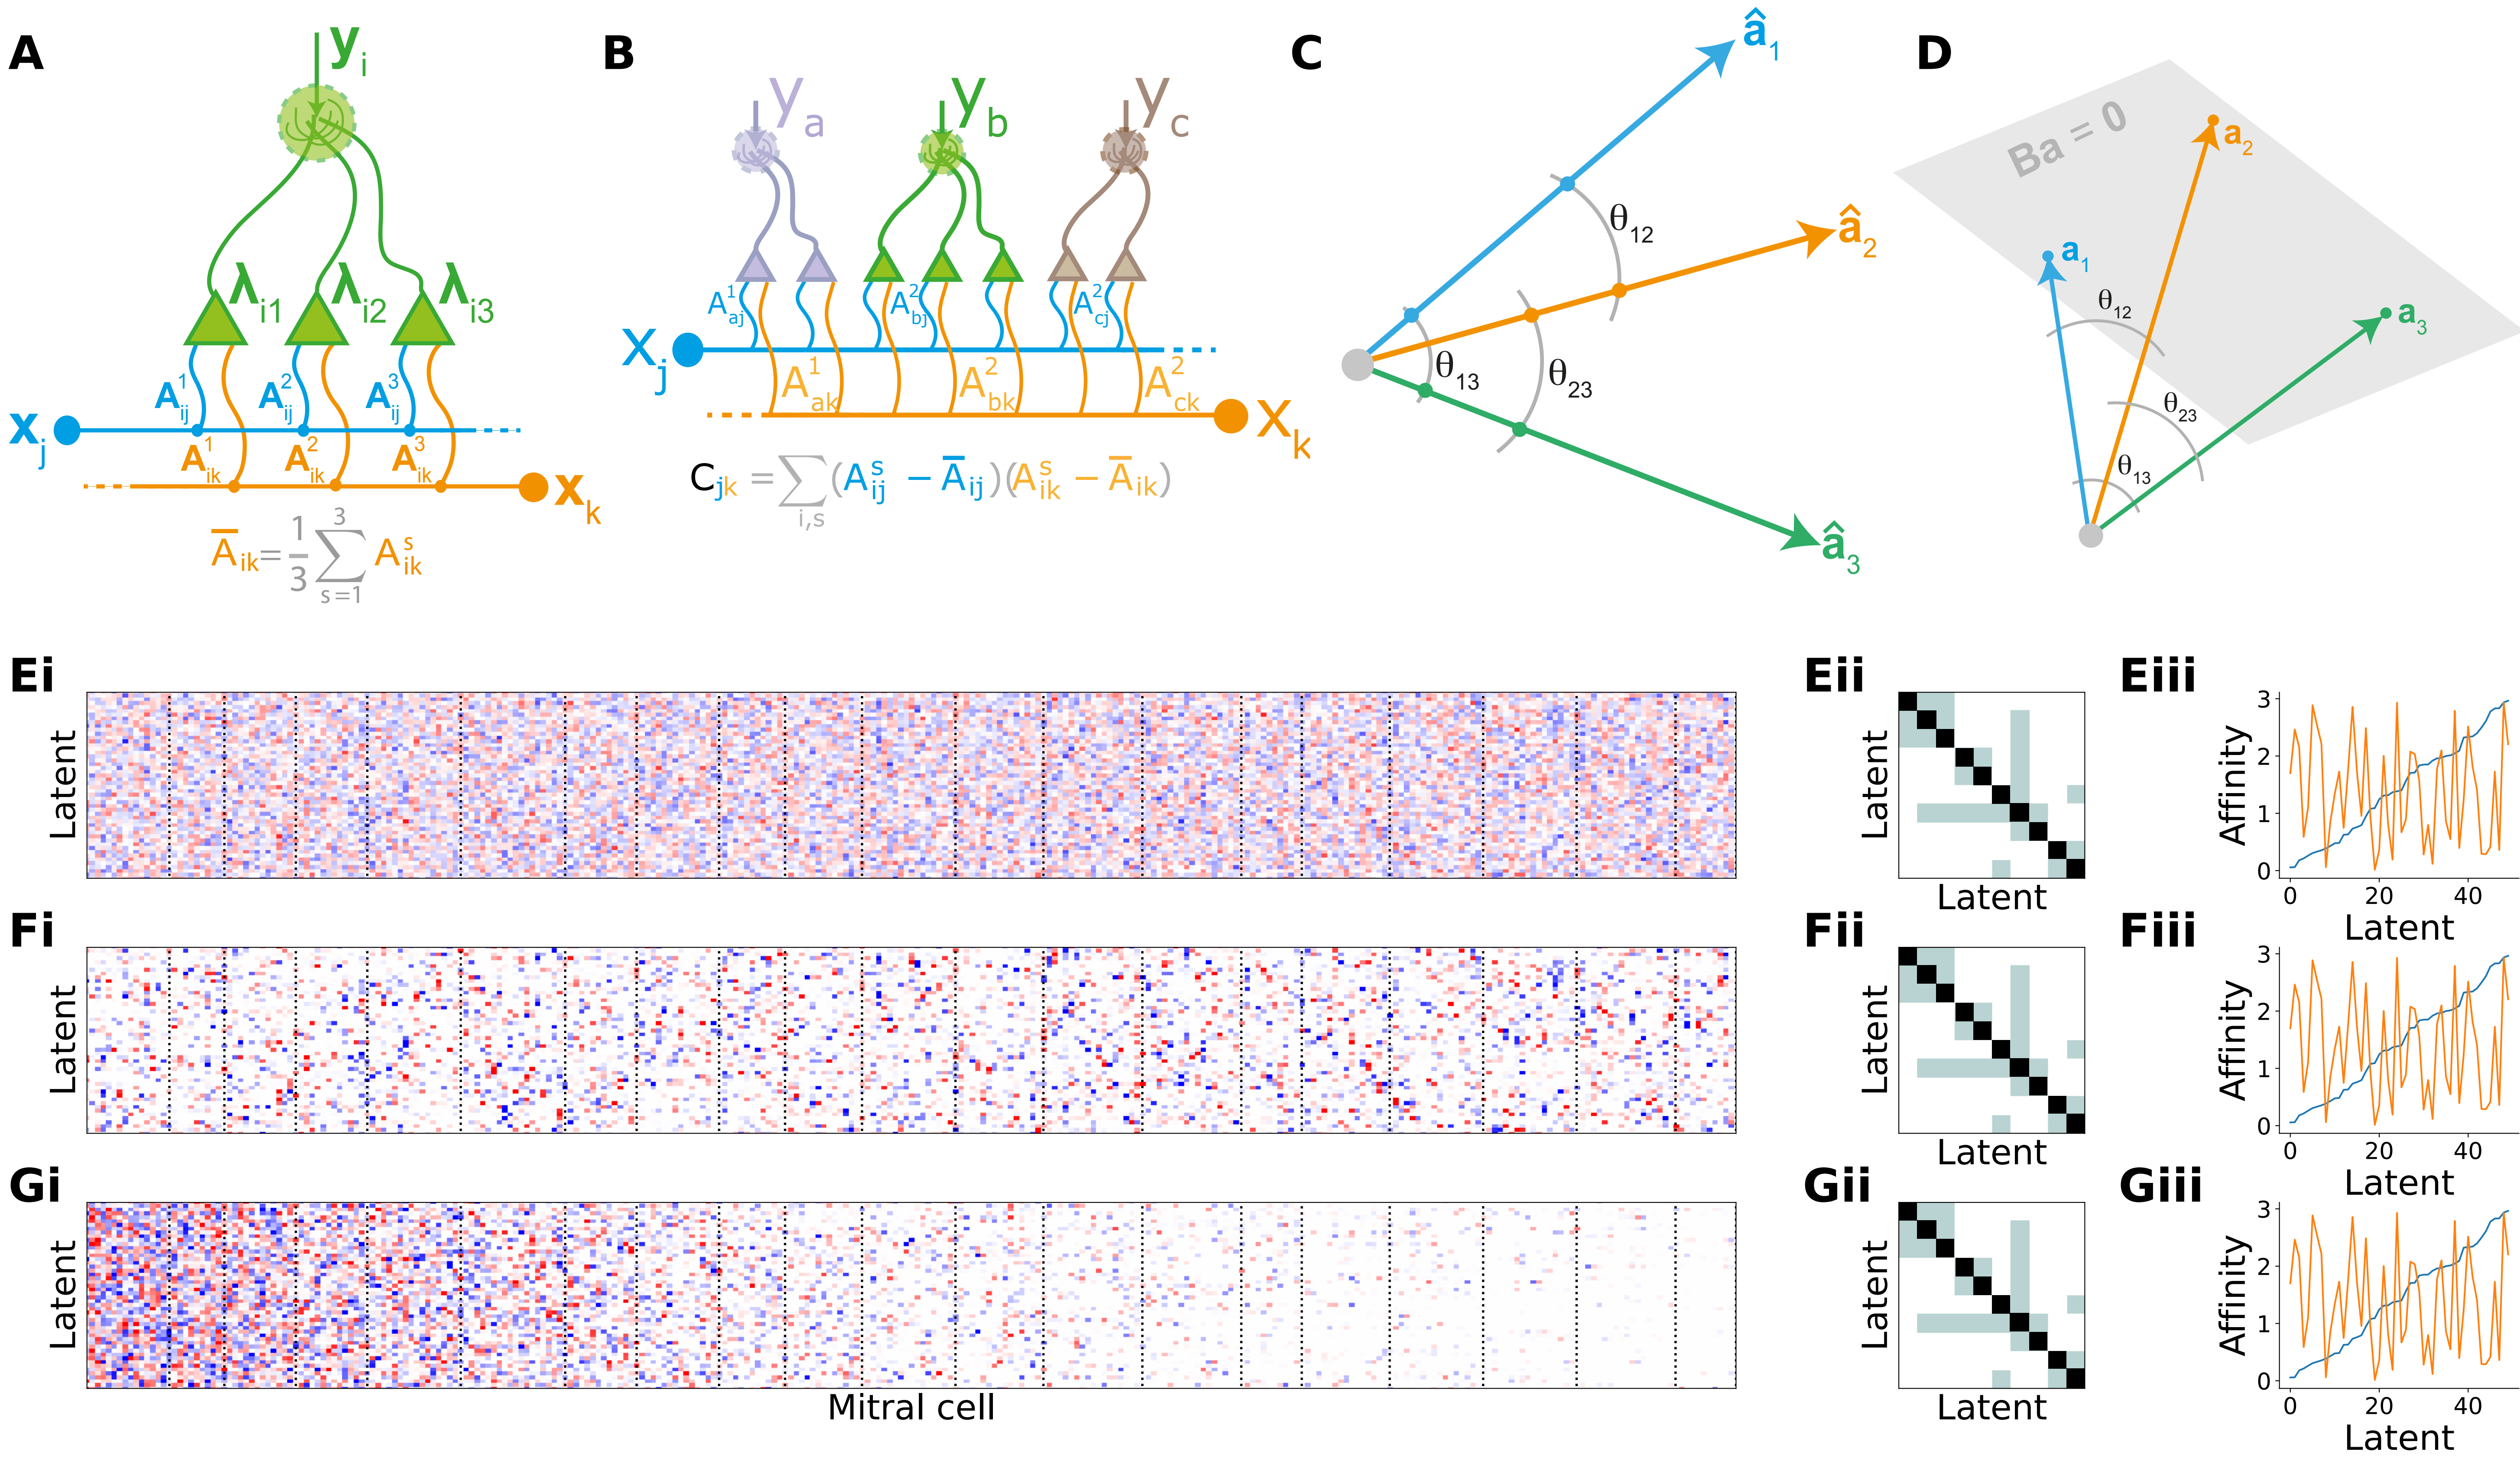

Supplement: supplementary_material [file schematic_final.pdf › repo/neurips/schematic_final.pdf]
